# Supplementary material
Source: HighWire-hosted journal article supplement (https://www.life-science-alliance.org/content/5/5/e202101244/F7)
Supplement: inline-supplementary-material-2 [file inline-supplementary-material-2.pdf]

Full Blot Fig 4E

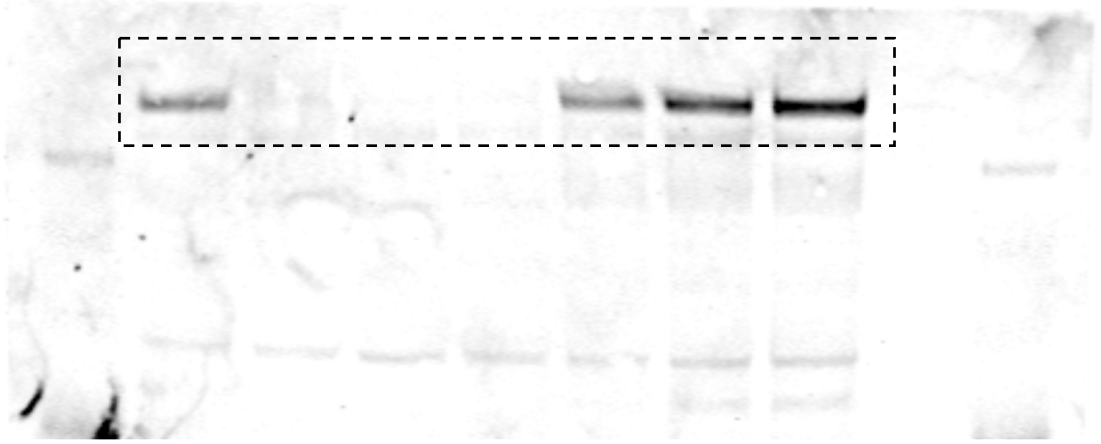

$\alpha$ -HA (Scc1)

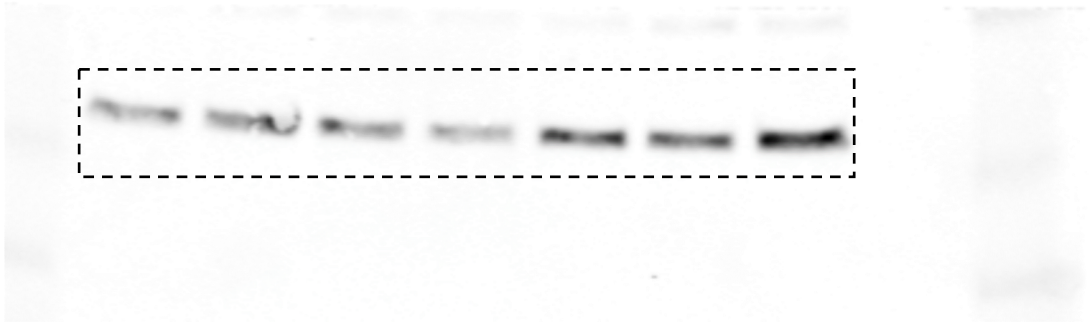

$\alpha$ -H3
